# Supplementary material
Source: PubMed Central journal article supplement (PMC3107284)
Supplement: 1014235108_pnas.201014235SI.pdf [file 1014235108_pnas.201014235SI.pdf]

# Supporting Information

Bertrand et al. 10.1073/pnas.1014235108

## SI Materials and Methods

**Syntenic Conservation Analysis.** Conserved syntenic regions in the genomes of *Monodelphis domestica*, *Canis familiaris*, *Gallus gallus*, *Xenopus tropicalis*, and *Tetraodon nigroviridis*, which are available in the Ensembl database (<http://www.ensembl.org/index.html>), and of *Branchiostoma floridae*, which is available at the US Department of Energy Joint Genome Institute (JGI) Web site (<http://genome.jgi-psf.org/Brafl1/Brafl1.home.html>), were obtained with CASSIOPE (9). When no statistically significant conserved regions containing an FGF gene were found in amphioxus, we searched its genome for orthologs of the genes that were found as part of the conserved regions in at least two vertebrates. Phylogenetic analyses to verify the orthology of each gene within the conserved regions were performed using RaxML version 7.0.4 with the WAG + G + I model, 100 bootstrap replicates, and the rapid bootstrapping algorithm (10). All the accession numbers for genes found in the conserved syntenic regions are given in Table S2.

**Immunostaining.** Embryos were fixed in 4% (wt/vol) paraformaldehyde as for in situ hybridization but were thereafter kept in PBS + 0.1% Tween 20 at 4° C until use. Three 10-minute washes in PBS + 0.1% Triton X100 were performed, followed by a 1-h incubation in PBS + 1% Triton X100. Embryos were blocked in PBS + 0.1% Triton X100 + 5% (vol/vol) sheep serum + 0.2% BSA for several hours. They were then incubated in blocking solution with antibodies diluted at a ratio of 1/250 [monoclonal antiacetylated-tubulin produced in mouse (T7451; Sigma) and antiphospho-histone H3 (Ser10) (06-570; Millipore)] overnight at 4° C. They were subsequently washed six times for 1 h in PBS +

0.1% Triton X100 and blocked again for several hours. They were then incubated overnight at 4° C in the blocking solution containing secondary antibodies coupled to FITC or Texas Red at a ratio of 1/250. Embryos were then washed three times for 10 min in PBS + 0.1% Tween 20 and mounted in glycerol with 2.5% DABCO (Sigma) for photographs.

**Pharmacological Treatments.** SU5402 and U0126 were dissolved at 10<sup>-2</sup> M in DMSO. A range of concentrations, ranging from 10 to 250 μM, was tested. At 10 μM, there is no effect of SU5402 treatment, whereas at >100 μM, development is completely arrested. The highest concentration at which we observe a specific effect is 50 μM, and at this dose, we observe a complete loss of the expression of two orthologs of vertebrate FGF signaling target genes: *Dusp6/7/9* and *ER81/Erm/Pea3* (Fig. S8). We therefore subsequently performed our experiments using 50 μM SU5402. For U0126, the effect on embryogenesis is specific between 10 and 25 μM; therefore, we used 25 μM except when specified otherwise in the text.

**Sections.** Sections ranging from 1 to 1.5 μm in thickness were performed after embedding in Epon resin and subsequently stained using Ponceau Red or Richardson Blue.

**Accession Numbers.** Accession numbers of the sequences used for probe synthesis are as follows: *FGF1/2* (EU606032.1), *FGF8/17/18* (EU606035.1), *FGF9/16/20* (EU606036.1), *FGFA* (EU606033.1), *FGFB* (EU606034.1), *FGFC* (EU606038.1), *FGFD* (HM854710), *FGFE* (EU606037.1), *FGFR* (HM854709), *Snail* (HM359129), and *Delta* (HM359124).

1. Letunic I, Doerks T, Bork P (2009) SMART 6: Recent updates and new developments. *Nucleic Acids Res* 37(Database issue):D229–D232.
2. Schultz J, Milpetz F, Bork P, Ponting CP (1998) SMART, a simple modular architecture research tool: Identification of signaling domains. *Proc Natl Acad Sci USA* 95: 5857–5864.
3. Thompson JD, Gibson TJ, Higgins DG (2002) Multiple sequence alignment using ClustalW and ClustalX. *Curr Protoc Bioinformatics*, Chapter 2:Unit 2.3.
4. Galtier N, Gouy M, Gautier C (1996) SEAVIEW and PHYLO\_WIN: Two graphic tools for sequence alignment and molecular phylogeny. *Comput Appl Biosci* 12:543–548.
5. Huelsenbeck JP, Ronquist F (2001) MRBAYES: Bayesian inference of phylogenetic trees. *Bioinformatics* 17:754–755.
6. Ronquist F, Huelsenbeck JP (2003) MrBayes 3: Bayesian phylogenetic inference under mixed models. *Bioinformatics* 19:1572–1574.
7. Yu JK, Meulemans D, McKeown SJ, Bronner-Fraser M (2008) Insights from the amphioxus genome on the origin of vertebrate neural crest. *Genome Res* 18: 1127–1132.
8. Meulemans D, Bronner-Fraser M (2007) Insights from amphioxus into the evolution of vertebrate cartilage. *PLoS ONE* 2:e787.
9. Rascol VL, et al. (2009) CASSIOPE: An expert system for conserved regions searches. *BMC Bioinformatics* 10:284.
10. Stamatakis A, Hoover P, Rougemont J (2008) A rapid bootstrap algorithm for the RAxML Web servers. *Syst Biol* 57:758–771.

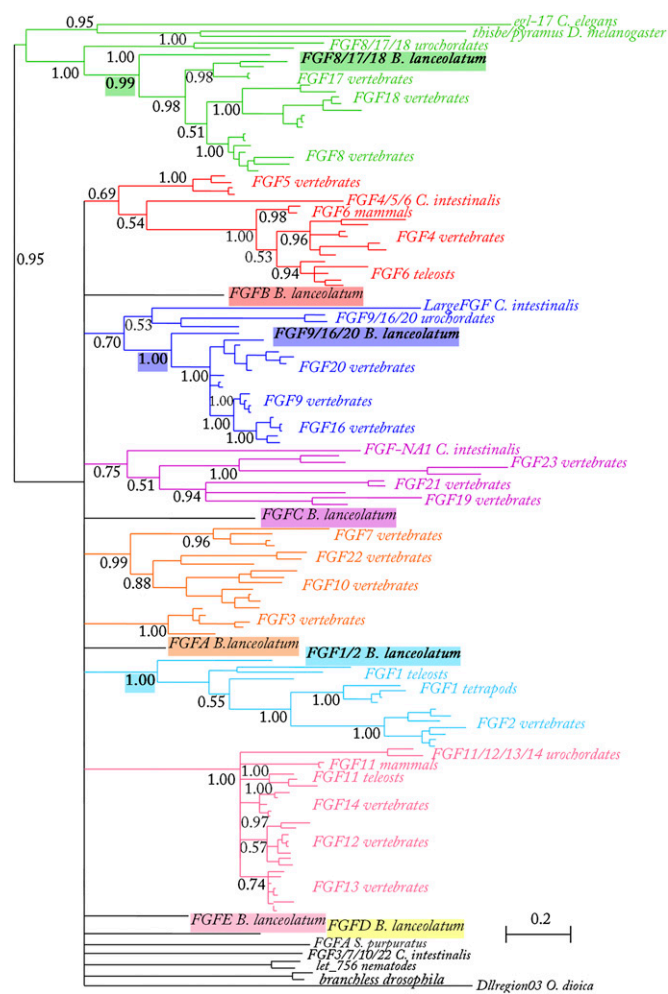

**Fig. S1.** Phylogenetic analysis of the FGF family. Only FGF domains, as predicted by the online SMART software (<http://smart.embl-heidelberg.de/>) (1, 2), were used for the alignment. Sequences were aligned automatically using ClustalX (3), with manual correction in Seaview (4). Bayesian inference trees were inferred using MrBayes 3.1.2 (5, 6), with the WAG + G + I model. Two independent runs of 1 million generations each, sampled every 100 generations with two chains, were performed. A 50 majority rule consensus tree was calculated using a 250,000-generation burn-in.

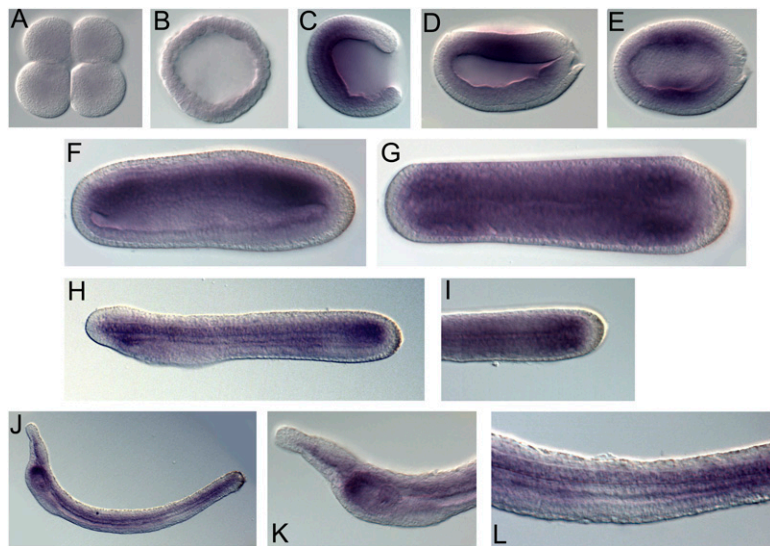

**Fig. 52.** FGFR expression pattern. The embryos were underincubated in the staining solution to detect the embryonic territories that express FGFR at a higher level. A probe for the TK domain was synthesized (accession no. HM854709). (A and B) Four-cell and blastula stage embryos showing no or very low expression of FGFR. (C) Gastrula stage embryo showing a higher level of expression in the anterior mesendoderm. (D and E) Lateral and dorsal views of a late gastrula/early neurula stage embryo. At this stage, expression is higher in the paraxial mesoderm. (F and G) Lateral and dorsal views of a midlate neurula stage embryo showing a higher FGFR expression level in the mesoderm, particularly in the most anterior and posterior somites. (H) Late neurula before the mouth opens showing a higher expression level in the notochord, the posterior somites, and the anterior pharyngeal endoderm. (I) Dorsal view of the posterior part of the specimen shown in H. (J) Larva showing a higher expression level in the notochord and the anterior pharyngeal endoderm. In the gut, the iliocolonic region is less strongly labeled than the other regions. (K) Enlargement of the anterior part of the specimen shown in J. (L) Enlargement at the level of the iliocolonic region of the specimen shown in J. Side views are shown except when specified. Anterior is to the left, and dorsal is to the top.

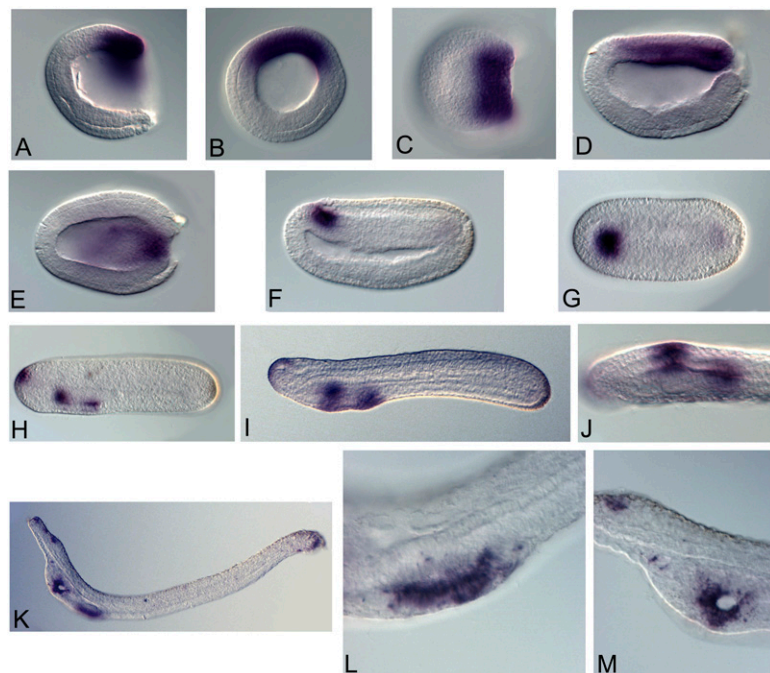

**Fig. 53.** FGF8/17/18 expression pattern. (A–C) Lateral, blastopore, and dorsal views of a gastrula stage embryo showing expression in the dorsal posterior mesendoderm. (D and E) Lateral and dorsal views of a late gastrula/early neurula stage embryo showing expression in the dorsal mesendoderm, with a higher level in the posterior part as described by Yu et al. (7). (F and G) Lateral and dorsal views of an early midneurula stage embryo showing a very high level of FGF8/17/18 expression in the anterior neural plate and a low level of FGF8/17/18 expression in the posterior mesoderm. (H) Lateral view of a midlate neurula stage embryo with expression in the anterior epidermis and in a ventral and a lateral spot in the pharyngeal endoderm as described by Meulemans and Bronner-Fraser (8). (I) Late neurula before the mouth opens showing expression in the anterior epidermis and in two regions of the pharyngeal endoderm corresponding to the mouth and first gill slit anlagen. (J) Ventral view of the anterior part of the specimen shown in I. (K) Larva showing expression of FGF8/17/18 in the cerebral vesicle, around the mouth, in the first gill slit, and in the posterior wall of the tailbud. (L) Enlargement of the specimen shown in K at the level of the first gill slit. (M) Enlargement of the specimen shown in K at the level of the mouth. Side views are shown except when specified. Anterior is to the left, and dorsal is to the top.

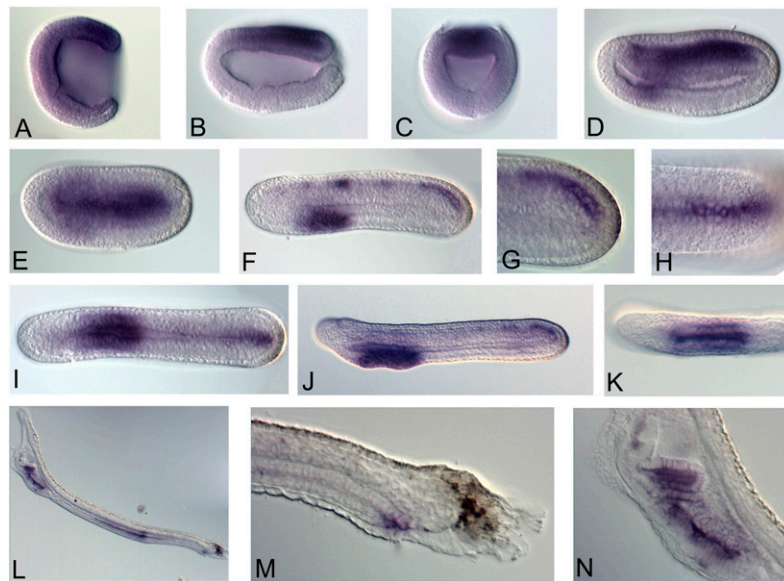

**Fig. 54.** FGF9/16/20 expression pattern. (A) Gastrula stage embryo with a higher level of FGF9/16/20 expression in the posterior dorsal ectoderm. (B and C) Lateral and blastopore views of a late gastrula stage embryo showing expression in the neural plate. (D and E) Lateral and dorsal views of an early midneurula stage embryo with labeling in the neural plate and the pharyngeal endoderm. (F–I) Views of a midlate neurula embryo. (F) Labeling is visible in the neural tube and in the pharyngeal endoderm. (G) Enlargement of the posterior part of the embryo shown in F. Dorsal view (I) and enlargement of the posterior part (H). (J) Late neurula embryo before the mouth opens showing expression in the pharynx and neural tube. (K) Ventral view of the anterior part of the specimen shown in J. (L) Larva showing FGF9/16/20 expression in the club-shaped gland, the first gill slit, the midgut, and the anus. Enlargement at the level of the tail (M) and at the level of the pharynx (N) of the larva shown in L. Side views are shown except when specified. Anterior is to the left, and dorsal is to the top.

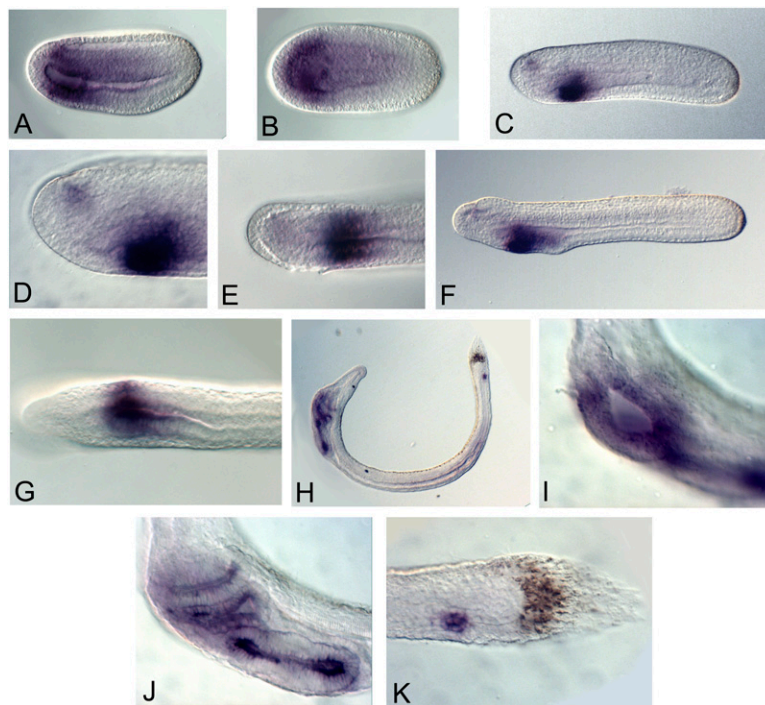

**Fig. 55.** FGFA expression pattern. (A and B) Lateral and dorsal views of an early midneurula stage embryo with expression in the anterior neural plate and in the pharyngeal endoderm. (C) Midlate neurula stage embryo showing FGFA expression in the cerebral vesicle and the ventral pharyngeal endoderm. (D and E) Enlarged lateral and ventral views of the specimen shown in C. (F) Late neurula before the mouth opens with labeling in the cerebral vesicle and in the pharyngeal endoderm. (G) Ventral view of the pharyngeal region of the specimen shown in F. (H) Larva showing FGFA expression around the mouth, in the endostyle, in the club-shaped gland, in the first gill slit, and in the anus. (I) Enlargement of the pharyngeal region focused on the mouth. (J) Enlargement of the pharyngeal region focusing on the right part. (K) Enlargement of the posterior part of the larva shown in H. Side views are shown except when specified. Anterior is to the left, and dorsal is to the top.

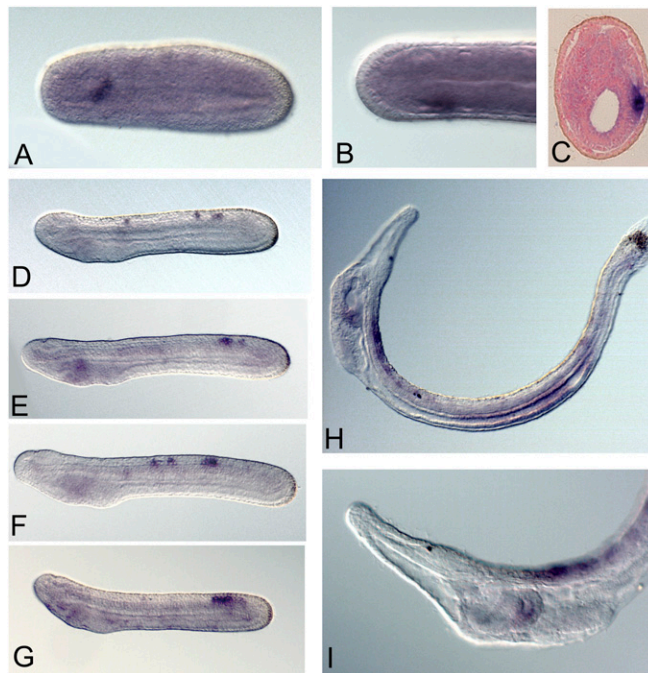

**Fig. S6.** FGFE expression pattern. (A) Midneurula stage embryo with restricted labeling in the first left somite. (B) Dorsal view of the anterior region of the specimen in A. (C) Section of the specimen shown in A at the level of the restricted labeling. (D–G) Late neurula stage embryos before the mouth opens. Dynamic expression is visible in some specific neurons. (H) Larva showing expression in the neural tube, the gut, and the club-shaped gland. (I) Enlargement of the anterior region of the larva shown in H. Side views are shown except when specified. Anterior is to the left, and dorsal is to the top.

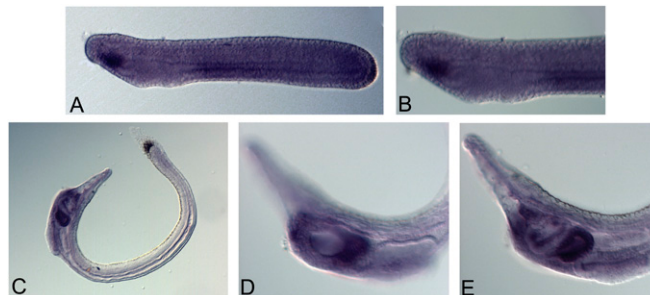

**Fig. S7.** FGFC expression pattern. (A) Late neurula stage embryo showing a higher expression level of FGFC in the anterior pharynx, in the midgut, and in the tailbud. (B) Enlargement of the anterior region of the specimen shown in A. (C) Larva with high FGFC expression level in the club-shaped gland, in the anterior most part of the pharynx, in the preoral pit, and in part of the endostyle. (D and E) Enlargement of the anterior part of the specimen shown in C focused on the mouth and on the right side, respectively. Side views are shown except when specified. Anterior is to the left, and dorsal is to the top.

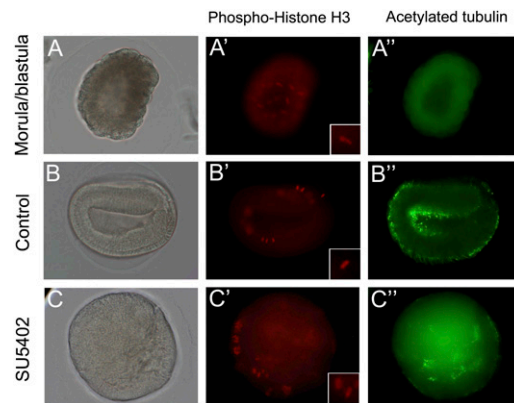

**Fig. 58.** Embryos treated with SU5402 at the four- to eight-cell stage are not arrested in their development. Immunostaining experiments were performed for WT morula/blastula stage embryos and for embryos treated with SU5402 at the four- to eight-cell stage and fixed at the early midneurula stage, as well as for the corresponding control embryos. In the morula/blastula embryos (A), all the cells are dividing, as shown by antiphospho-histone H3 immunostaining (A'), but there are still no cilia, as demonstrated by the absence of labeling after antiacetylated-tubulin immunostaining (A''). In the treated embryos (C), only some patches of cells are labeled using the antiphospho-histone H3 antibody (C'), as in the control embryos (B, B'). Enlarged images of labeled nuclei are shown at the lower right in A'–C' (boxes). The antiacetylated-tubulin staining shows that in treated embryos, cilia are well developed (C''), as in control embryos (B'') (SI Materials and Methods).

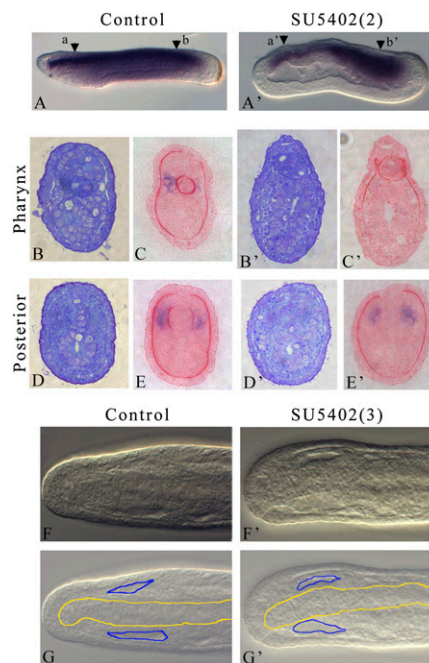

**Fig. 59.** Somite morphology after treatments with SU5402. (A, A') Sections of embryos after in situ hybridization using a probe for *MLC*, stained with Richardson Blue and Ponceau Red. In late neurula stage control embryos, the somites are clearly visible and express *MLC* in the pharyngeal (B and C, sections at the level of a in A) and posterior (D and E, sections at the level of b in A) regions. In the SU5402-treated (treatment 2; Fig. 3A) late neurula stage embryos, no somites are formed in the pharyngeal region (B' and C', sections at the level of a' in A'), whereas in the posterior region, somite morphology and *MLC* expression are normal (D' and E', sections at the level of b' in A'). (F, F' and G, G') differential optical contrast images of the anterior part of late neurula stage embryos, dorsal views. The anterior somite cavities are clearly visible in the control embryos (F and G) as well as in SU5402-treated embryos (treatment 3; Fig. 3A) (F' and G'). (G, G') Somite cavities are encircled in yellow and notochord in blue.

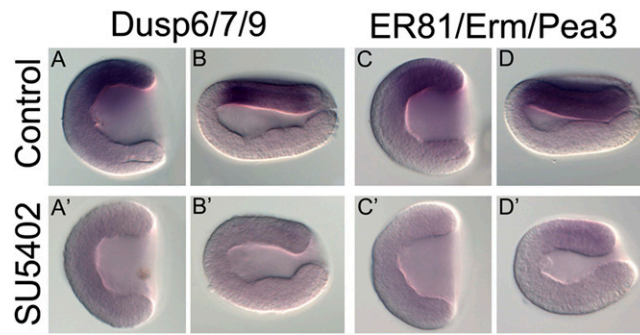

**Fig. S10.** SU5402 treatment at 50  $\mu\text{M}$  abolishes expression of Dusp6/7/9 and ER81/Erm/Pea3. Embryos were treated from blastula to gastrula or to early neurula stage with 50  $\mu\text{M}$  of SU5402. In situ hybridization experiments were performed using probes for Dusp6/7/9 (HM359125) and ER81/Erm/Pea3 (HM359126) on treated and control embryos. (A–D) At the gastrula and early neurula stages, Dusp6/7/9 and ER81/Erm/Pea3 are expressed in the dorsal mesendoderm and ectoderm in control embryos. (A'–D') In SU5402-treated embryos, expression is totally absent at both stages even after several days of incubation in the staining solution. Dusp6/7/9 and ER81/Erm/Pea3 are the orthologs of well-known FGF pathway target genes in vertebrates. This experiment leads us to suggest, first, that both genes are FGF signaling target genes and, second, that our SU5402 treatment at 50  $\mu\text{M}$  is able to inhibit the pathway completely.

**Table S1. Characteristics of eight predicted amphioxus FGF proteins**

| Name                 | Protein domain                                                  | Exon–intron                                   |
|----------------------|-----------------------------------------------------------------|-----------------------------------------------|
| Amphioxus FGF1/2     | FGF 35–163, 1.86e-44                                            | 1–205 // 206–310 // 311–501                   |
| Amphioxus FGF8/17/18 | Signal peptide 1–31/FGF 55–181, 1.39e-25/low complexity 200–217 | 1–41 // 42–80 // 81–262 // 263–369 // 370–654 |
| Amphioxus FGF9/16/20 | Low complexity 4–19/FGF 48 179, 5.35e-68                        | 1–244 // 245–346 // 347–591                   |
| Amphioxus FGFA       | Signal peptide 1–16/FGF 56–189, 2.90e-55/low complexity 206–215 | 1–265 // 266–369 // 370–651                   |
| Amphioxus FGFB       | Signal peptide 1–24/FGF 55–185, 4.75e-51                        | 1–98 // 99–262 // 263–564                     |
| Amphioxus FGFC       | Signal peptide 1–20/FGF 60–193, 1.70e-38/low complexity 210–232 | 1–279 // 280–385 // 386–699                   |
| Amphioxus FGFD       | Signal peptide 1–26/FGF 51–199, 6.54e-31/low complexity 202–213 | 1–258 // 259–393 // 394–687                   |
| Amphioxus FGFE       | FGF 61–192, 9.71e-57                                            | 1–283 // 284–386 // 387–582                   |

Protein domains of the eight amphioxus FGFs, predicted by SMART (<http://smart.embl-heidelberg.de/>), are indicated (including the e value for the FGF domain). The exon-intron structure of the coding sequence of the eight amphioxus FGFs is also indicated.

**Table S2. Accession number of the genes in the conserved syntenic regions**

| Vertebrates paralogues, abbreviations | Vertebrates paralogues, names | Homo sapiens     | Monodelphis domestica | Canis familiaris   | Gallus gallus      | Xenopus tropicalis | Tetraodon nigroviridis | Proorhtholog name | Branchiostoma floridae |
|---------------------------------------|-------------------------------|------------------|-----------------------|--------------------|--------------------|--------------------|------------------------|-------------------|------------------------|
| FGF1/2                                | BBS7                          | ENSG000000138686 | ENSMODG00000018927    | ENSCAFG00000004128 | ENSGALG00000011880 | ENSGALG00000011880 | ENSTNIG0000000013049   | BBS7              | 113523                 |
|                                       | GRXCR1                        | ENSG00000005203  | ENSMODG00000024820    | ENSCAFG00000003537 | ENSGALG00000023032 | ENSGALG00000023032 | ENSTNIG0000000015736   | GRXCR1/2          | 63706                  |
|                                       | GRXCR2                        | ENSG00000004928  | ENSMODG00000023740    | ENSCAFG00000006236 | ENSGALG00000023774 | ENSGALG00000023774 | ENSTNIG0000000018212   | KIAA0141          | 117215                 |
|                                       | KIAA0141                      | ENSG00000001791  | ENSMODG00000010456    | ENSCAFG00000003988 | TBLASTN            | TBLASTN            | ENSTNIG0000000014206   | SPATA5            | 63613, 117082          |
|                                       | SPATA5                        | ENSG00000005375  | ENSMODG00000018895    | ENSCAFG00000003988 | ENSGALG00000011833 | ENSGALG00000011833 | ENSTNIG0000000013064   | SPRY              | 117102                 |
|                                       | SPRY1                         | ENSG00000004056  | ENSMODG00000018890    | ENSCAFG00000003979 |                    |                    |                        |                   |                        |
|                                       | SPRY2                         |                  |                       |                    |                    |                    |                        |                   |                        |
|                                       | SPRY3                         |                  |                       |                    |                    |                    |                        |                   |                        |
|                                       | SPRY4                         | ENSG00000007678  | ENSMODG00000023756    | ENSCAFG00000006250 | ENSGALG00000007336 | ENSGALG00000007336 | ENSTNIG0000000018206   | C19orf29          | 121714                 |
| FGF3/7/10/22                          | C19orf29                      | ENSG00000005298  | ENSMODG00000006837    | ENSCAFG00000009208 |                    |                    |                        |                   |                        |
|                                       | LMNA                          |                  |                       |                    |                    |                    |                        | Nuclear Lamin     | 121709                 |
|                                       | LMNB1                         | ENSG00000003368  |                       |                    | ENSGALG00000006083 | ENSGALG00000006083 |                        |                   |                        |
|                                       | LMNB2                         | ENSG00000006619  | ENSMODG00000004824    | ENSCAFG00000009389 | ENSGALG00000000470 | ENSGALG00000000470 |                        |                   |                        |
|                                       | PIAS1                         | ENSG00000003800  |                       | ENSCAFG00000007463 | ENSGALG00000007970 | ENSGALG00000007970 | ENSTNIG0000000009549   | PIAS1/2/3/4       | 194147, 279826         |
|                                       | PIAS2                         |                  |                       |                    | ENSGALG00000001843 | ENSGALG00000001843 |                        |                   |                        |
|                                       | PIAS3                         |                  |                       |                    |                    |                    |                        |                   |                        |
|                                       | PIAS4                         | ENSG00000005229  | ENSMODG00000000765    | ENSCAFG00000009154 | ENSGALG00000001836 | ENSGALG00000001836 | ENSTNIG0000000003243   |                   |                        |



**Table S2. Cont.**

| Vertebrates paralogues, abbreviations | Vertebrates paralogues, names                         | <i>Homo sapiens</i> | <i>Monodelphis domestica</i> | <i>Canis familiaris</i> | <i>Gallus gallus</i> | <i>Xenopus tropicalis</i> | <i>Tetraodon nigroviridis</i> | Proortholog name | <i>Branchiostoma floridae</i> |
|---------------------------------------|-------------------------------------------------------|---------------------|------------------------------|-------------------------|----------------------|---------------------------|-------------------------------|------------------|-------------------------------|
| FGF4/5/6                              | C12orf4                                               | ENSG00000004        | ENSMODG000000                | ENSACFG00000001         | ENSGALG000000        | ENSXETG000000             | ENSTNIG000000008              | C12orf4          | 126642, 283171                |
|                                       | Uncharacterized protein C12orf4                       | 7621                | 18299                        | 5354                    | 17289                | 05966                     | 813                           |                  |                               |
| CD9                                   | CD9 molecule                                          | ENSG00000001        | ENSMODG000000                | ENSACFG00000001         | ENSGALG000000        |                           | ENSTNIG000000019              | CD9/81/TSPAN2    | 96598                         |
|                                       |                                                       | 0278                | 18053                        | 5172                    | 17274                |                           | 223, ENSTNIG000000012         |                  |                               |
| CD81                                  | CD81 molecule                                         | ENSG00000001        |                              | ENSACFG00000001         | ENSGALG000000        |                           | ENSTNIG000000013              |                  |                               |
|                                       |                                                       | 0651                |                              | 0121                    | 06546                |                           | 685                           |                  |                               |
| TSPAN2                                | Tetraspanin 2                                         | ENSG00000011        | ENSMODG000000                | ENSACFG00000001         | ENSGALG000000        |                           | ENSTNIG000000011              | FoxM             | 232011                        |
| FoxM1                                 | Forkhead box M1                                       | 1206                | 18349                        | 5642                    | 013420               |                           | 394                           |                  |                               |
| TSPAN4                                | Tetraspanin 4                                         | ENSG00000021        |                              | ENSACFG00000002         | ENSGALG000000        |                           |                               | TSPAN4/9/CD53    | 231999                        |
|                                       |                                                       | 4063                |                              | 5574                    | 06837                |                           |                               |                  |                               |
| TSPAN9                                | Tetraspanin 9                                         | ENSG00000001        | ENSMODG000000                | ENSACFG00000001         | ENSGALG000000        |                           | ENSTNIG000000019              |                  |                               |
|                                       |                                                       | 1105                | 18335                        | 5466                    | 14346                |                           | 258, ENSTNIG000000012         |                  |                               |
| CD53                                  | CD53 molecule                                         | ENSG00000010        |                              | ENSACFG00000000         | ENSGALG000000        |                           | ENSTNIG00000004023            | CCNJ/JL          | 93075                         |
| CCNJ                                  | Cyclin J                                              | 7443                |                              | 8454                    | 06955                |                           |                               |                  |                               |
| CCNJL                                 | Cyclin J-like                                         | ENSG00000013        | ENSMODG000000                |                         | ENSGALG000000        |                           | ENSTNIG00000004651            |                  |                               |
|                                       |                                                       | 5083                | 07987                        |                         | 01455                |                           |                               |                  |                               |
| GPAM                                  | Glycerol-3-phosphate acyltransferase, mitochondrial   | ENSG00000011        | ENSMODG000000                | ENSACFG00000001         | ENSGALG000000        |                           |                               | GPAM             | 126875, 126887                |
|                                       |                                                       | 9927                | 10326                        | 0868                    | 08795                |                           |                               |                  |                               |
| GPAT2                                 | Glycerol-3-phosphate acyltransferase 2, mitochondrial |                     | ENSMODG000000                |                         |                      |                           |                               |                  |                               |
|                                       |                                                       |                     | 08088                        |                         |                      |                           |                               |                  |                               |
| HPSE                                  | Heparanase                                            | ENSG00000017        | ENSMODG000000                | ENSACFG00000000         | ENSGALG000000        |                           |                               | HPSE1/2          | 931000                        |
| HPSE2                                 | Heparanase 2                                          | 2987                | 03602                        | 9386                    | 07508                |                           |                               |                  |                               |
| PEBP4                                 | Phosphatidylinositol 4-OH kinase class 4              | ENSG00000013        | ENSMODG000000                | ENSACFG00000000         | ENSGALG000000        |                           |                               | PEBP4            | 126894                        |
|                                       |                                                       | 4020                | 09235                        | 9270                    |                      |                           |                               |                  |                               |
| RHOBTB1                               | Rho-related BTB domain containing 1                   | ENSG00000007        | ENSMODG000000                | ENSACFG00000001         | ENSGALG000000        |                           |                               | RHOBTB1/2        | 93088                         |
|                                       |                                                       | 2422                | 17097                        | 2932                    | 03073                |                           |                               |                  |                               |
| RHOBTB2                               | Rho-related BTB domain containing 2                   | ENSG00000000        | ENSMODG000000                | ENSACFG00000000         |                      |                           |                               |                  |                               |
|                                       |                                                       | 8853                | 09229                        | 9245                    |                      |                           |                               |                  |                               |
